# Supplementary material for: Nanoscale phononic interconnects in THz frequencies
Source: Royal Society of Chemistry journal article supplement (doi:10.1039/c4cp02328e), 2014-09-19
Supplement: c4cp02328e1.pdf [file c4cp02328e1.pdf]

## Supplemental information for Nanoscale Phononic Interconnects in THz frequencies

Aris P. Sgouros<sup>1,3</sup>, Mahesh R. Neupane<sup>2</sup>, M. M. Sigalas<sup>1</sup>, N. Aravantinos-Zafiris<sup>1</sup> and Roger K. Lake<sup>2</sup>

<sup>1</sup>*Department of Materials Science, University of Patras, 26504 Patras, Greece*

<sup>2</sup>*Laboratory for Terascale and Terahertz Electronics (LATTE), Department of Electrical And Computer Engineering, University of California, Riverside, CA*

<sup>3</sup>*School of Chemical Engineering, National Technical University of Athens (NTUA), 15780 Athens, Greece*

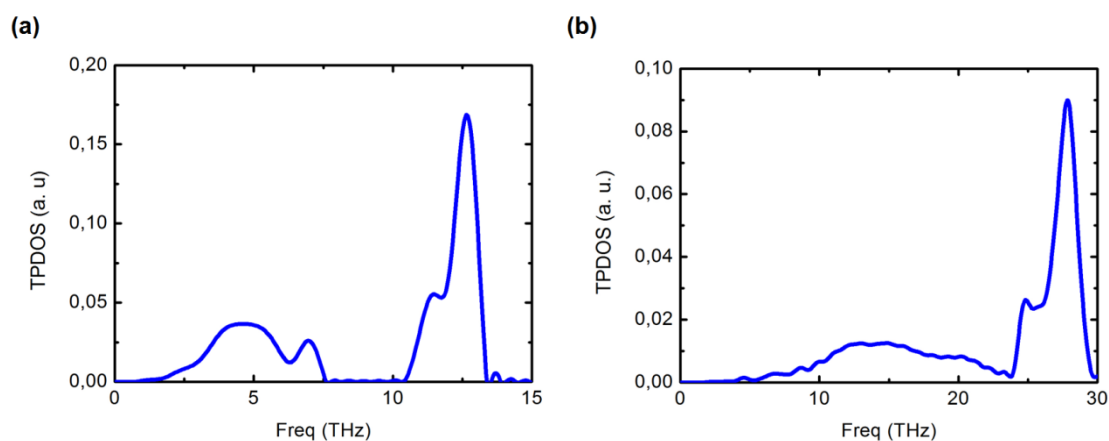

Figure. S1. The TPDOS for (a) bulk GeSi and (b) bulk SiC calculated from the VACF method.
